# Supplementary material
Source: publisher figshare collection journal article supplement (https://acs.figshare.com/ndownloader/files/4376542)
Supplement: Supplementary file 1 [file 4376542]

data_bztca-caf_0m

 

_audit_creation_method            SHELXL-97

_chemical_name_systematic

;

 ?

;

_chemical_name_common             ?

_chemical_melting_point           ?

_chemical_formula_moiety          ?

_chemical_formula_sum

 'C25 H26 N8 O10'

_chemical_formula_weight          598.54

 

loop_

 _atom_type_symbol

 _atom_type_description

 _atom_type_scat_dispersion_real

 _atom_type_scat_dispersion_imag

 _atom_type_scat_source

 'C'  'C'   0.0033   0.0016

 'International Tables Vol C Tables 4.2.6.8 and 6.1.1.4'

 'H'  'H'   0.0000   0.0000

 'International Tables Vol C Tables 4.2.6.8 and 6.1.1.4'

 'N'  'N'   0.0061   0.0033

 'International Tables Vol C Tables 4.2.6.8 and 6.1.1.4'

 'O'  'O'   0.0106   0.0060

 'International Tables Vol C Tables 4.2.6.8 and 6.1.1.4'

 

_symmetry_cell_setting            Triclinic

_symmetry_space_group_name_H-M    P-1

 

loop_

 _symmetry_equiv_pos_as_xyz

 'x, y, z'

 '-x, -y, -z'

 

_cell_length_a                    9.6071(4)

_cell_length_b                    10.3730(4)

_cell_length_c                    15.3939(7)

_cell_angle_alpha                 76.390(3)

_cell_angle_beta                  81.941(3)

_cell_angle_gamma                 66.586(3)

_cell_volume                      1366.35(10)

_cell_formula_units_Z             2

_cell_measurement_temperature     296(2)

_cell_measurement_reflns_used     1968

_cell_measurement_theta_min       3.82

_cell_measurement_theta_max       20.86

 

_exptl_crystal_description        'blocks'

_exptl_crystal_colour             'colorless'

_exptl_crystal_size_max           0.25

_exptl_crystal_size_mid           0.16

_exptl_crystal_size_min           0.12

_exptl_crystal_density_meas       ?

_exptl_crystal_density_diffrn     1.455

_exptl_crystal_density_method     'not measured'

_exptl_crystal_F_000              624

_exptl_absorpt_coefficient_mu     0.115

_exptl_absorpt_correction_type    none

_exptl_absorpt_correction_T_min   ?

_exptl_absorpt_correction_T_max   ?

_exptl_absorpt_process_details    ?

 

_exptl_special_details

;

 ?

;

 

_diffrn_ambient_temperature       296(2)

_diffrn_radiation_wavelength      0.71073

_diffrn_radiation_type            MoK\a

_diffrn_radiation_source          'fine-focus sealed tube'

_diffrn_radiation_monochromator   graphite

_diffrn_measurement_device_type   'CCD area detector'

_diffrn_measurement_method        'phi and omega scans'

_diffrn_detector_area_resol_mean  ?

_diffrn_standards_number          ?

_diffrn_standards_interval_count  ?

_diffrn_standards_interval_time   ?

_diffrn_standards_decay_%         ?

_diffrn_reflns_number             15143

_diffrn_reflns_av_R_equivalents   0.0492

_diffrn_reflns_av_sigmaI/netI     0.0632

_diffrn_reflns_limit_h_min        -11

_diffrn_reflns_limit_h_max        11

_diffrn_reflns_limit_k_min        -12

_diffrn_reflns_limit_k_max        12

_diffrn_reflns_limit_l_min        -18

_diffrn_reflns_limit_l_max        17

_diffrn_reflns_theta_min          2.31

_diffrn_reflns_theta_max          25.00

_reflns_number_total              4733

_reflns_number_gt                 2721

_reflns_threshold_expression      >2sigma(I)

 

_computing_data_collection        'Bruker SMART'

_computing_cell_refinement        'Bruker SMART'

_computing_data_reduction         'Bruker SAINT'

_computing_structure_solution     'SHELXS-97 (Sheldrick, 1990)'

_computing_structure_refinement   'SHELXL-97 (Sheldrick, 1997)'

_computing_molecular_graphics     'Bruker SHELXTL'

_computing_publication_material   'Bruker SHELXTL'

 

_refine_special_details

;

 Refinement of F^2^ against ALL reflections.  The weighted R-factor wR and

 goodness of fit S are based on F^2^, conventional R-factors R are based

 on F, with F set to zero for negative F^2^. The threshold expression of

 F^2^ > 2sigma(F^2^) is used only for calculating R-factors(gt) etc. and is

 not relevant to the choice of reflections for refinement.  R-factors based

 on F^2^ are statistically about twice as large as those based on F, and R-

 factors based on ALL data will be even larger.

;

 

_refine_ls_structure_factor_coef  Fsqd

_refine_ls_matrix_type            full

_refine_ls_weighting_scheme       calc

_refine_ls_weighting_details

 'calc w=1/[\s^2^(Fo^2^)+(0.1831P)^2^+0.0057P] where P=(Fo^2^+2Fc^2^)/3'

_atom_sites_solution_primary      direct

_atom_sites_solution_secondary    difmap

_atom_sites_solution_hydrogens    geom

_refine_ls_hydrogen_treatment     constr

_refine_ls_extinction_method      SHELXL

_refine_ls_extinction_coef        0.038(10)

_refine_ls_extinction_expression

 'Fc^*^=kFc[1+0.001xFc^2^\l^3^/sin(2\q)]^-1/4^'

_refine_ls_number_reflns          4733

_refine_ls_number_parameters      398

_refine_ls_number_restraints      0

_refine_ls_R_factor_all           0.1018

_refine_ls_R_factor_gt            0.0720

_refine_ls_wR_factor_ref          0.2461

_refine_ls_wR_factor_gt           0.2149

_refine_ls_goodness_of_fit_ref    1.086

_refine_ls_restrained_S_all       1.086

_refine_ls_shift/su_max           0.002

_refine_ls_shift/su_mean          0.000

 

loop_

 _atom_site_label

 _atom_site_type_symbol

 _atom_site_fract_x

 _atom_site_fract_y

 _atom_site_fract_z

 _atom_site_U_iso_or_equiv

 _atom_site_adp_type

 _atom_site_occupancy

 _atom_site_symmetry_multiplicity

 _atom_site_calc_flag

 _atom_site_refinement_flags

 _atom_site_disorder_assembly

 _atom_site_disorder_group

C1 C 1.1204(6) 0.9065(6) 0.2743(3) 0.0678(15) Uani 1 1 d . . .

H1A H 1.0652 0.9490 0.3241 0.102 Uiso 1 1 calc R . .

H1B H 1.1160 0.9806 0.2227 0.102 Uiso 1 1 calc R . .

H1C H 1.2244 0.8515 0.2886 0.102 Uiso 1 1 calc R . .

C2 C 1.0276(5) 0.7144(5) 0.3261(3) 0.0502(11) Uani 1 1 d . . .

C3 C 0.9252(6) 0.5266(6) 0.3865(3) 0.0685(15) Uani 1 1 d . . .

H3A H 1.0155 0.4431 0.4018 0.103 Uiso 1 1 calc R . .

H3B H 0.8502 0.4989 0.3697 0.103 Uiso 1 1 calc R . .

H3C H 0.8864 0.5719 0.4372 0.103 Uiso 1 1 calc R . .

C4 C 0.9234(5) 0.6400(5) 0.2262(3) 0.0465(10) Uani 1 1 d . . .

C5 C 0.8466(5) 0.6133(5) 0.1118(3) 0.0583(12) Uani 1 1 d . . .

H5 H 0.8052 0.5798 0.0751 0.070 Uiso 1 1 calc R . .

C6 C 0.8976(8) 0.8008(8) -0.0097(3) 0.091(2) Uani 1 1 d . . .

H6A H 0.8662 0.7591 -0.0489 0.137 Uiso 1 1 calc R . .

H6B H 0.9978 0.7991 -0.0286 0.137 Uiso 1 1 calc R . .

H6C H 0.8282 0.8981 -0.0115 0.137 Uiso 1 1 calc R . .

C7 C 0.9498(5) 0.7373(5) 0.1565(3) 0.0524(11) Uani 1 1 d . . .

C8 C 1.0176(6) 0.8312(5) 0.1664(3) 0.0567(12) Uani 1 1 d . . .

C9 C 0.2142(7) 0.2303(6) 0.2451(4) 0.0780(16) Uani 1 1 d . . .

H9A H 0.2864 0.1530 0.2187 0.117 Uiso 1 1 calc R . .

H9B H 0.1233 0.2736 0.2125 0.117 Uiso 1 1 calc R . .

H9C H 0.1904 0.1940 0.3063 0.117 Uiso 1 1 calc R . .

C10 C 0.3245(5) 0.3463(5) 0.3219(3) 0.0568(12) Uani 1 1 d . . .

C11 C 0.4315(6) 0.4582(6) 0.4042(3) 0.0646(14) Uani 1 1 d . . .

H11A H 0.4692 0.5339 0.3927 0.097 Uiso 1 1 calc R . .

H11B H 0.5098 0.3693 0.4285 0.097 Uiso 1 1 calc R . .

H11C H 0.3455 0.4790 0.4462 0.097 Uiso 1 1 calc R . .

C12 C 0.3963(5) 0.5375(5) 0.2407(3) 0.0489(11) Uani 1 1 d . . .

C13 C 0.4385(6) 0.6940(6) 0.1419(4) 0.0751(16) Uani 1 1 d . . .

H13 H 0.4687 0.7690 0.1134 0.090 Uiso 1 1 calc R . .

C14 C 0.3393(7) 0.6749(8) 0.0048(3) 0.0919(19) Uani 1 1 d . . .

H14A H 0.2536 0.7644 -0.0029 0.138 Uiso 1 1 calc R . .

H14B H 0.3143 0.6036 -0.0122 0.138 Uiso 1 1 calc R . .

H14C H 0.4244 0.6864 -0.0321 0.138 Uiso 1 1 calc R . .

C15 C 0.3502(5) 0.5263(5) 0.1637(3) 0.0502(11) Uani 1 1 d . . .

C16 C 0.2903(5) 0.4245(6) 0.1592(3) 0.0566(12) Uani 1 1 d . . .

C17 C 0.6349(5) -0.0433(5) 0.3167(3) 0.0471(11) Uani 1 1 d . . .

C18 C 0.6574(5) -0.0816(5) 0.4056(3) 0.0551(12) Uani 1 1 d . . .

H18 H 0.6300 -0.1553 0.4401 0.066 Uiso 1 1 calc R . .

C19 C 0.7207(5) -0.0130(5) 0.4463(3) 0.0538(12) Uani 1 1 d . . .

H19 H 0.7356 -0.0412 0.5074 0.065 Uiso 1 1 calc R . .

C20 C 0.7615(5) 0.0973(5) 0.3961(2) 0.0440(10) Uani 1 1 d . . .

C21 C 0.7338(5) 0.1422(5) 0.3053(3) 0.0458(11) Uani 1 1 d . . .

C22 C 0.6723(5) 0.0708(5) 0.2664(3) 0.0490(11) Uani 1 1 d . . .

H22 H 0.6554 0.0992 0.2056 0.059 Uiso 1 1 calc R . .

C23 C 0.5753(5) -0.1200(5) 0.2708(3) 0.0549(12) Uani 1 1 d . . .

C24 C 0.8524(6) 0.1533(5) 0.4395(3) 0.0505(11) Uani 1 1 d . . .

C25 C 0.7655(5) 0.2658(5) 0.2480(3) 0.0537(12) Uani 1 1 d . . .

N1 N 1.0527(4) 0.8125(4) 0.2555(2) 0.0537(10) Uani 1 1 d . . .

N2 N 0.9613(4) 0.6270(4) 0.3114(2) 0.0520(10) Uani 1 1 d . . .

N3 N 0.8599(4) 0.5618(4) 0.1989(2) 0.0521(10) Uani 1 1 d . . .

N4 N 0.8988(5) 0.7185(4) 0.0821(2) 0.0605(11) Uani 1 1 d . . .

N5 N 0.2792(4) 0.3378(4) 0.2418(2) 0.0567(10) Uani 1 1 d . . .

N6 N 0.3853(4) 0.4466(4) 0.3199(2) 0.0512(10) Uani 1 1 d . . .

N7 N 0.4511(4) 0.6404(4) 0.2288(3) 0.0569(10) Uani 1 1 d . . .

N8 N 0.3773(5) 0.6303(5) 0.0968(3) 0.0693(12) Uani 1 1 d . . .

O1 O 1.0488(5) 0.9184(5) 0.1074(2) 0.0933(14) Uani 1 1 d . . .

O2 O 1.0662(4) 0.7014(4) 0.4023(2) 0.0700(10) Uani 1 1 d . . .

O3 O 0.2495(4) 0.4096(4) 0.0903(2) 0.0814(12) Uani 1 1 d . . .

O4 O 0.3099(5) 0.2668(4) 0.3920(2) 0.0814(11) Uani 1 1 d . . .

O5 O 0.5461(5) -0.0830(4) 0.1923(2) 0.0811(12) Uani 1 1 d . . .

O6 O 0.5586(4) -0.2333(4) 0.3220(2) 0.0686(10) Uani 1 1 d . . .

H6 H 0.5197 -0.2675 0.2941 0.103 Uiso 1 1 calc R . .

O7 O 0.7737(4) 0.2132(4) 0.5073(2) 0.0703(10) Uani 1 1 d . . .

H7 H 0.8315 0.2214 0.5382 0.105 Uiso 1 1 calc R . .

O8 O 0.9804(4) 0.1379(4) 0.4174(2) 0.0675(10) Uani 1 1 d . . .

O9 O 0.7648(4) 0.3585(4) 0.2924(2) 0.0651(10) Uani 1 1 d . . .

H9 H 0.8050 0.4113 0.2610 0.098 Uiso 1 1 calc R . .

O10 O 0.7856(6) 0.2817(5) 0.1685(2) 0.1150(18) Uani 1 1 d . . .

 

loop_

 _atom_site_aniso_label

 _atom_site_aniso_U_11

 _atom_site_aniso_U_22

 _atom_site_aniso_U_33

 _atom_site_aniso_U_23

 _atom_site_aniso_U_13

 _atom_site_aniso_U_12

C1 0.080(3) 0.072(4) 0.080(3) -0.029(3) -0.005(3) -0.050(3)

C2 0.057(3) 0.051(3) 0.052(3) -0.015(2) -0.009(2) -0.025(2)

C3 0.096(4) 0.075(4) 0.047(3) 0.004(2) -0.017(2) -0.051(3)

C4 0.059(3) 0.043(3) 0.045(2) -0.0073(19) -0.0080(19) -0.026(2)

C5 0.075(3) 0.061(3) 0.054(3) -0.010(2) -0.012(2) -0.039(3)

C6 0.140(5) 0.122(5) 0.040(3) 0.012(3) -0.023(3) -0.088(5)

C7 0.065(3) 0.053(3) 0.048(3) -0.007(2) -0.003(2) -0.034(2)

C8 0.080(3) 0.056(3) 0.050(3) -0.014(2) -0.002(2) -0.041(3)

C9 0.093(4) 0.073(4) 0.090(4) -0.016(3) -0.002(3) -0.056(3)

C10 0.063(3) 0.057(3) 0.057(3) -0.014(2) -0.002(2) -0.029(3)

C11 0.076(3) 0.079(4) 0.047(3) -0.012(2) -0.014(2) -0.035(3)

C12 0.056(3) 0.049(3) 0.046(2) -0.009(2) -0.0060(19) -0.024(2)

C13 0.102(4) 0.074(4) 0.072(4) -0.013(3) -0.008(3) -0.056(4)

C14 0.118(5) 0.105(5) 0.055(3) -0.003(3) -0.017(3) -0.048(4)

C15 0.063(3) 0.052(3) 0.046(2) -0.011(2) -0.004(2) -0.032(2)

C16 0.056(3) 0.063(3) 0.059(3) -0.019(2) -0.004(2) -0.027(3)

C17 0.055(3) 0.048(3) 0.046(2) -0.009(2) -0.0105(19) -0.025(2)

C18 0.072(3) 0.056(3) 0.053(3) -0.011(2) -0.002(2) -0.040(3)

C19 0.076(3) 0.056(3) 0.042(2) -0.006(2) -0.007(2) -0.040(3)

C20 0.054(3) 0.047(3) 0.038(2) -0.0098(18) -0.0059(18) -0.025(2)

C21 0.054(3) 0.049(3) 0.041(2) -0.0081(19) -0.0058(18) -0.025(2)

C22 0.061(3) 0.054(3) 0.041(2) -0.009(2) -0.0053(19) -0.030(2)

C23 0.064(3) 0.051(3) 0.061(3) -0.009(2) -0.009(2) -0.033(2)

C24 0.071(3) 0.051(3) 0.040(2) -0.006(2) -0.009(2) -0.035(2)

C25 0.073(3) 0.056(3) 0.046(3) -0.006(2) -0.012(2) -0.039(3)

N1 0.060(2) 0.052(2) 0.061(2) -0.0201(19) 0.0001(18) -0.029(2)

N2 0.068(2) 0.053(2) 0.044(2) -0.0062(17) -0.0113(17) -0.032(2)

N3 0.071(2) 0.057(2) 0.042(2) -0.0034(17) -0.0107(17) -0.038(2)

N4 0.083(3) 0.067(3) 0.047(2) -0.0034(18) -0.0123(19) -0.046(2)

N5 0.068(3) 0.057(3) 0.057(2) -0.0102(19) -0.0056(18) -0.036(2)

N6 0.059(2) 0.056(2) 0.045(2) -0.0101(17) -0.0048(16) -0.027(2)

N7 0.072(3) 0.054(2) 0.057(2) -0.0084(18) -0.0129(18) -0.036(2)

N8 0.089(3) 0.073(3) 0.052(2) -0.010(2) -0.003(2) -0.038(3)

O1 0.157(4) 0.096(3) 0.067(2) 0.001(2) -0.009(2) -0.098(3)

O2 0.089(2) 0.086(3) 0.056(2) -0.0219(18) -0.0130(17) -0.047(2)

O3 0.109(3) 0.101(3) 0.063(2) -0.026(2) -0.014(2) -0.062(3)

O4 0.112(3) 0.085(3) 0.061(2) 0.0103(19) -0.0155(19) -0.062(2)

O5 0.131(3) 0.077(3) 0.061(2) -0.0045(19) -0.034(2) -0.062(2)

O6 0.099(3) 0.071(2) 0.062(2) -0.0077(17) -0.0179(18) -0.058(2)

O7 0.080(2) 0.086(3) 0.066(2) -0.0331(19) -0.0086(18) -0.042(2)

O8 0.063(2) 0.089(3) 0.072(2) -0.0266(18) -0.0018(17) -0.045(2)

O9 0.103(3) 0.057(2) 0.0533(19) -0.0056(16) -0.0020(17) -0.053(2)

O10 0.237(5) 0.132(4) 0.038(2) -0.007(2) -0.006(3) -0.140(4)

 

_geom_special_details

;

 All esds (except the esd in the dihedral angle between two l.s. planes)

 are estimated using the full covariance matrix.  The cell esds are taken

 into account individually in the estimation of esds in distances, angles

 and torsion angles; correlations between esds in cell parameters are only

 used when they are defined by crystal symmetry.  An approximate (isotropic)

 treatment of cell esds is used for estimating esds involving l.s. planes.

;

 

loop_

 _geom_bond_atom_site_label_1

 _geom_bond_atom_site_label_2

 _geom_bond_distance

 _geom_bond_site_symmetry_2

 _geom_bond_publ_flag

C1 N1 1.467(5) . ?

C1 H1A 0.9600 . ?

C1 H1B 0.9600 . ?

C1 H1C 0.9600 . ?

C2 O2 1.239(5) . ?

C2 N1 1.369(6) . ?

C2 N2 1.370(5) . ?

C3 N2 1.466(5) . ?

C3 H3A 0.9600 . ?

C3 H3B 0.9600 . ?

C3 H3C 0.9600 . ?

C4 N3 1.354(5) . ?

C4 C7 1.361(6) . ?

C4 N2 1.372(5) . ?

C5 N3 1.325(5) . ?

C5 N4 1.336(6) . ?

C5 H5 0.9300 . ?

C6 N4 1.467(6) . ?

C6 H6A 0.9600 . ?

C6 H6B 0.9600 . ?

C6 H6C 0.9600 . ?

C7 N4 1.390(5) . ?

C7 C8 1.413(6) . ?

C8 O1 1.218(5) . ?

C8 N1 1.408(6) . ?

C9 N5 1.468(6) . ?

C9 H9A 0.9600 . ?

C9 H9B 0.9600 . ?

C9 H9C 0.9600 . ?

C10 O4 1.223(6) . ?

C10 N6 1.374(6) . ?

C10 N5 1.396(6) . ?

C11 N6 1.474(5) . ?

C11 H11A 0.9600 . ?

C11 H11B 0.9600 . ?

C11 H11C 0.9600 . ?

C12 N7 1.334(6) . ?

C12 C15 1.366(6) . ?

C12 N6 1.375(6) . ?

C13 N7 1.325(6) . ?

C13 N8 1.380(6) . ?

C13 H13 0.9300 . ?

C14 N8 1.433(6) . ?

C14 H14A 0.9600 . ?

C14 H14B 0.9600 . ?

C14 H14C 0.9600 . ?

C15 N8 1.385(6) . ?

C15 C16 1.408(6) . ?

C16 O3 1.243(5) . ?

C16 N5 1.392(6) . ?

C17 C18 1.355(6) . ?

C17 C22 1.399(6) . ?

C17 C23 1.484(6) . ?

C18 C19 1.389(6) . ?

C18 H18 0.9300 . ?

C19 C20 1.384(6) . ?

C19 H19 0.9300 . ?

C20 C21 1.394(5) . ?

C20 C24 1.514(5) . ?

C21 C22 1.382(6) . ?

C21 C25 1.488(6) . ?

C22 H22 0.9300 . ?

C23 O5 1.214(5) . ?

C23 O6 1.306(5) . ?

C24 O8 1.186(5) . ?

C24 O7 1.326(5) . ?

C25 O10 1.195(5) . ?

C25 O9 1.302(5) . ?

O6 H6 0.8200 . ?

O7 H7 0.8200 . ?

O9 H9 0.8200 . ?

 

loop_

 _geom_angle_atom_site_label_1

 _geom_angle_atom_site_label_2

 _geom_angle_atom_site_label_3

 _geom_angle

 _geom_angle_site_symmetry_1

 _geom_angle_site_symmetry_3

 _geom_angle_publ_flag

N1 C1 H1A 109.5 . . ?

N1 C1 H1B 109.5 . . ?

H1A C1 H1B 109.5 . . ?

N1 C1 H1C 109.5 . . ?

H1A C1 H1C 109.5 . . ?

H1B C1 H1C 109.5 . . ?

O2 C2 N1 121.6(4) . . ?

O2 C2 N2 119.5(4) . . ?

N1 C2 N2 118.9(4) . . ?

N2 C3 H3A 109.5 . . ?

N2 C3 H3B 109.5 . . ?

H3A C3 H3B 109.5 . . ?

N2 C3 H3C 109.5 . . ?

H3A C3 H3C 109.5 . . ?

H3B C3 H3C 109.5 . . ?

N3 C4 C7 111.3(4) . . ?

N3 C4 N2 127.0(4) . . ?

C7 C4 N2 121.7(4) . . ?

N3 C5 N4 113.1(4) . . ?

N3 C5 H5 123.4 . . ?

N4 C5 H5 123.4 . . ?

N4 C6 H6A 109.5 . . ?

N4 C6 H6B 109.5 . . ?

H6A C6 H6B 109.5 . . ?

N4 C6 H6C 109.5 . . ?

H6A C6 H6C 109.5 . . ?

H6B C6 H6C 109.5 . . ?

C4 C7 N4 105.4(4) . . ?

C4 C7 C8 122.8(4) . . ?

N4 C7 C8 131.8(4) . . ?

O1 C8 N1 120.6(4) . . ?

O1 C8 C7 127.0(4) . . ?

N1 C8 C7 112.4(4) . . ?

N5 C9 H9A 109.5 . . ?

N5 C9 H9B 109.5 . . ?

H9A C9 H9B 109.5 . . ?

N5 C9 H9C 109.5 . . ?

H9A C9 H9C 109.5 . . ?

H9B C9 H9C 109.5 . . ?

O4 C10 N6 121.0(4) . . ?

O4 C10 N5 120.7(4) . . ?

N6 C10 N5 118.3(4) . . ?

N6 C11 H11A 109.5 . . ?

N6 C11 H11B 109.5 . . ?

H11A C11 H11B 109.5 . . ?

N6 C11 H11C 109.5 . . ?

H11A C11 H11C 109.5 . . ?

H11B C11 H11C 109.5 . . ?

N7 C12 C15 113.4(4) . . ?

N7 C12 N6 126.3(4) . . ?

C15 C12 N6 120.3(4) . . ?

N7 C13 N8 115.1(4) . . ?

N7 C13 H13 122.5 . . ?

N8 C13 H13 122.5 . . ?

N8 C14 H14A 109.5 . . ?

N8 C14 H14B 109.5 . . ?

H14A C14 H14B 109.5 . . ?

N8 C14 H14C 109.5 . . ?

H14A C14 H14C 109.5 . . ?

H14B C14 H14C 109.5 . . ?

C12 C15 N8 106.1(4) . . ?

C12 C15 C16 123.8(4) . . ?

N8 C15 C16 130.1(4) . . ?

O3 C16 N5 121.3(4) . . ?

O3 C16 C15 125.6(5) . . ?

N5 C16 C15 113.1(4) . . ?

C18 C17 C22 118.6(4) . . ?

C18 C17 C23 122.3(4) . . ?

C22 C17 C23 119.1(4) . . ?

C17 C18 C19 121.3(4) . . ?

C17 C18 H18 119.4 . . ?

C19 C18 H18 119.4 . . ?

C20 C19 C18 120.1(4) . . ?

C20 C19 H19 119.9 . . ?

C18 C19 H19 119.9 . . ?

C19 C20 C21 119.5(4) . . ?

C19 C20 C24 118.4(4) . . ?

C21 C20 C24 121.7(4) . . ?

C22 C21 C20 119.0(4) . . ?

C22 C21 C25 118.2(4) . . ?

C20 C21 C25 122.8(4) . . ?

C21 C22 C17 121.4(4) . . ?

C21 C22 H22 119.3 . . ?

C17 C22 H22 119.3 . . ?

O5 C23 O6 122.5(4) . . ?

O5 C23 C17 123.6(4) . . ?

O6 C23 C17 114.0(4) . . ?

O8 C24 O7 125.1(4) . . ?

O8 C24 C20 123.3(4) . . ?

O7 C24 C20 111.5(4) . . ?

O10 C25 O9 122.5(4) . . ?

O10 C25 C21 123.7(4) . . ?

O9 C25 C21 113.7(4) . . ?

C2 N1 C8 125.4(4) . . ?

C2 N1 C1 117.2(4) . . ?

C8 N1 C1 117.4(4) . . ?

C2 N2 C4 118.8(4) . . ?

C2 N2 C3 120.2(4) . . ?

C4 N2 C3 121.0(3) . . ?

C5 N3 C4 104.4(3) . . ?

C5 N4 C7 105.9(3) . . ?

C5 N4 C6 127.1(4) . . ?

C7 N4 C6 126.9(4) . . ?

C16 N5 C10 124.8(4) . . ?

C16 N5 C9 117.6(4) . . ?

C10 N5 C9 117.6(4) . . ?

C12 N6 C10 119.7(4) . . ?

C12 N6 C11 121.4(4) . . ?

C10 N6 C11 118.9(4) . . ?

C13 N7 C12 102.5(4) . . ?

C13 N8 C15 102.9(4) . . ?

C13 N8 C14 126.6(5) . . ?

C15 N8 C14 130.3(5) . . ?

C23 O6 H6 109.5 . . ?

C24 O7 H7 109.5 . . ?

C25 O9 H9 109.5 . . ?

 

loop_

 _geom_torsion_atom_site_label_1

 _geom_torsion_atom_site_label_2

 _geom_torsion_atom_site_label_3

 _geom_torsion_atom_site_label_4

 _geom_torsion

 _geom_torsion_site_symmetry_1

 _geom_torsion_site_symmetry_2

 _geom_torsion_site_symmetry_3

 _geom_torsion_site_symmetry_4

 _geom_torsion_publ_flag

N3 C4 C7 N4 0.4(5) . . . . ?

N2 C4 C7 N4 179.4(4) . . . . ?

N3 C4 C7 C8 -179.0(4) . . . . ?

N2 C4 C7 C8 0.1(7) . . . . ?

C4 C7 C8 O1 177.9(5) . . . . ?

N4 C7 C8 O1 -1.2(10) . . . . ?

C4 C7 C8 N1 -0.4(7) . . . . ?

N4 C7 C8 N1 -179.6(5) . . . . ?

N7 C12 C15 N8 -0.1(6) . . . . ?

N6 C12 C15 N8 -179.4(4) . . . . ?

N7 C12 C15 C16 179.2(4) . . . . ?

N6 C12 C15 C16 -0.2(7) . . . . ?

C12 C15 C16 O3 -178.8(5) . . . . ?

N8 C15 C16 O3 0.3(9) . . . . ?

C12 C15 C16 N5 1.4(7) . . . . ?

N8 C15 C16 N5 -179.6(5) . . . . ?

C22 C17 C18 C19 -2.0(7) . . . . ?

C23 C17 C18 C19 176.6(4) . . . . ?

C17 C18 C19 C20 0.3(7) . . . . ?

C18 C19 C20 C21 2.2(7) . . . . ?

C18 C19 C20 C24 -170.4(4) . . . . ?

C19 C20 C21 C22 -2.9(7) . . . . ?

C24 C20 C21 C22 169.5(4) . . . . ?

C19 C20 C21 C25 176.1(4) . . . . ?

C24 C20 C21 C25 -11.5(7) . . . . ?

C20 C21 C22 C17 1.2(7) . . . . ?

C25 C21 C22 C17 -177.8(4) . . . . ?

C18 C17 C22 C21 1.2(7) . . . . ?

C23 C17 C22 C21 -177.4(4) . . . . ?

C18 C17 C23 O5 175.8(5) . . . . ?

C22 C17 C23 O5 -5.6(7) . . . . ?

C18 C17 C23 O6 -5.2(7) . . . . ?

C22 C17 C23 O6 173.4(4) . . . . ?

C19 C20 C24 O8 112.1(5) . . . . ?

C21 C20 C24 O8 -60.4(7) . . . . ?

C19 C20 C24 O7 -64.4(6) . . . . ?

C21 C20 C24 O7 123.2(4) . . . . ?

C22 C21 C25 O10 -23.6(8) . . . . ?

C20 C21 C25 O10 157.4(5) . . . . ?

C22 C21 C25 O9 154.4(4) . . . . ?

C20 C21 C25 O9 -24.6(6) . . . . ?

O2 C2 N1 C8 177.6(4) . . . . ?

N2 C2 N1 C8 -1.0(7) . . . . ?

O2 C2 N1 C1 -2.9(7) . . . . ?

N2 C2 N1 C1 178.5(4) . . . . ?

O1 C8 N1 C2 -177.6(5) . . . . ?

C7 C8 N1 C2 0.9(7) . . . . ?

O1 C8 N1 C1 2.9(7) . . . . ?

C7 C8 N1 C1 -178.6(4) . . . . ?

O2 C2 N2 C4 -178.1(4) . . . . ?

N1 C2 N2 C4 0.6(6) . . . . ?

O2 C2 N2 C3 4.8(7) . . . . ?

N1 C2 N2 C3 -176.6(4) . . . . ?

N3 C4 N2 C2 178.8(4) . . . . ?

C7 C4 N2 C2 -0.1(7) . . . . ?

N3 C4 N2 C3 -4.1(7) . . . . ?

C7 C4 N2 C3 177.0(4) . . . . ?

N4 C5 N3 C4 0.5(6) . . . . ?

C7 C4 N3 C5 -0.5(5) . . . . ?

N2 C4 N3 C5 -179.6(4) . . . . ?

N3 C5 N4 C7 -0.3(6) . . . . ?

N3 C5 N4 C6 -178.3(5) . . . . ?

C4 C7 N4 C5 0.0(5) . . . . ?

C8 C7 N4 C5 179.2(5) . . . . ?

C4 C7 N4 C6 178.0(5) . . . . ?

C8 C7 N4 C6 -2.8(9) . . . . ?

O3 C16 N5 C10 179.0(4) . . . . ?

C15 C16 N5 C10 -1.1(7) . . . . ?

O3 C16 N5 C9 -1.4(7) . . . . ?

C15 C16 N5 C9 178.4(4) . . . . ?

O4 C10 N5 C16 179.4(5) . . . . ?

N6 C10 N5 C16 -0.3(7) . . . . ?

O4 C10 N5 C9 -0.2(7) . . . . ?

N6 C10 N5 C9 -179.9(4) . . . . ?

N7 C12 N6 C10 179.3(4) . . . . ?

C15 C12 N6 C10 -1.4(7) . . . . ?

N7 C12 N6 C11 1.9(7) . . . . ?

C15 C12 N6 C11 -178.8(4) . . . . ?

O4 C10 N6 C12 -178.1(4) . . . . ?

N5 C10 N6 C12 1.6(7) . . . . ?

O4 C10 N6 C11 -0.6(7) . . . . ?

N5 C10 N6 C11 179.1(4) . . . . ?

N8 C13 N7 C12 0.2(6) . . . . ?

C15 C12 N7 C13 -0.1(6) . . . . ?

N6 C12 N7 C13 179.2(5) . . . . ?

N7 C13 N8 C15 -0.2(6) . . . . ?

N7 C13 N8 C14 174.3(5) . . . . ?

C12 C15 N8 C13 0.2(5) . . . . ?

C16 C15 N8 C13 -179.0(5) . . . . ?

C12 C15 N8 C14 -174.1(5) . . . . ?

C16 C15 N8 C14 6.7(9) . . . . ?

 

_diffrn_measured_fraction_theta_max    0.981

_diffrn_reflns_theta_full              25.00

_diffrn_measured_fraction_theta_full   0.981

_refine_diff_density_max    0.542

_refine_diff_density_min   -0.510

_refine_diff_density_rms    0.058
